# Supplementary material for: A lightly Fe-doped (NiS2/MoS2)/carbon nanotube hybrid electrocatalyst film with laser-drilled micropores for stabilized overall water splitting and pH-universal hydrogen evolution reaction
Source: Royal Society of Chemistry journal article supplement (doi:10.1039/d0ta04586a), 2020-01-01
Supplement: d0ta04586a1.pdf [file d0ta04586a1.pdf]

## Supporting Information for

### **Lightly Fe-doped (NiS<sub>2</sub>/MoS<sub>2</sub>)/Carbon Nanotube Hybrid Electrocatalyst Film with Laser-Drilled Micropores for Stabilized Overall Water Splitting and pH-Universal Hydrogen Evolution Reaction**

Chenyu Li,<sup>a</sup> Mingda Liu,<sup>a</sup> Hanyuan Ding,<sup>a</sup> Liqiong He,<sup>a</sup> Enze Wang,<sup>a</sup> Bolun Wang,<sup>a</sup>

Shoushan Fan<sup>b</sup> and Kai Liu<sup>\*a</sup>

<sup>a</sup> State Key Laboratory of New Ceramics and Fine Processing, School of Materials Science and Engineering, Tsinghua University, Beijing 100084, P. R. China.

<sup>b</sup> Department of Physics and Tsinghua-Foxconn Nanotechnology Research Center, Tsinghua University, Beijing 100084, P. R. China.

\* Corresponding Author. E-mail: [liuk@tsinghua.edu.cn](mailto:liuk@tsinghua.edu.cn); Tel: +86-10-62799182.

## **Experimental Section**

### ***Preparation of CNT film***

CNT films were derived from a super-aligned carbon nanotube (SACNT) array, which was synthesized in a low pressure chemical vapor deposition system, as reported in our previous work.<sup>S1</sup> In the SACNT array, CNTs are much denser and aligned much better than those in ordinary arrays, and have very clean surface and good electrical conductivity with few defects.<sup>S2</sup> To prepare our CNT film, 20 mg CNTs were removed out of the SACNT array into 250 ml ethanol and dispersed under high-power probe ultrasonication (SCIENTZ-950E) for 5 minutes. Then, a CNT film was fabricated by suction filtration from the above mixed solution. After the CNT film was sufficiently dried at 80 °C for 10 hours, small discs with diameter of 10 mm ( $\Phi_{10}$  discs) were cut from it by a laser cutting machine (18W) as the substrate.

### ***Synthesis of Fe-(NiS<sub>2</sub>/MoS<sub>2</sub>)/CNT film***

Fe(NO<sub>3</sub>)<sub>3</sub>·9H<sub>2</sub>O, NiCl<sub>2</sub> and MoCl<sub>5</sub> were added into 50ml ethanol in different proportions and stirred for 3 days to get a fully dissolved precursor solution (molar ratios of Ni and Mo were 1: 1, 1: 2 and 1: 3; molar ratios of Fe and Ni were 1:18, 1: 9, 1: 3, 2: 3 and 1: 1, respectively). The CNT film was placed on a heating stage at a temperature of 70 °C, and then the precursor solution was added on it dropwise until the load was about 6 mg. After dried for 1 hour and drilled by laser, the CNT film with micropores was then annealed in a 10% H<sub>2</sub> & 90% Ar atmosphere at 400 °C for 30 minutes. During annealing, a sufficient amount of sulfur powder was placed at the upper end of the airflow and its temperature was maintained at 190 °C. The synthesized Fe-(NiS<sub>2</sub>/MoS<sub>2</sub>)/CNT film was washed with deionized water and ethanol orderly for 3 minutes and dried before the following electrochemical tests.

### ***Processing of micropores by laser direct writing***

This step follows after the precursor loading and before annealing. The laser ( $\lambda=1.06\ \mu\text{m}$ ) was set to 18 W in power, which drilled through-holes on the film. The obtained micropores on small  $\Phi_{10}$  discs have a spacing of 800  $\mu\text{m}$ . The average diameter of the pores was about 40  $\mu\text{m}$ , which depends on the size of laser spot and the focusing degree.

### ***Sample characterizations***

The morphology of the samples was observed by scanning electron microscope (SEM, ZEISS, Merlin Compact) and transmission electron microscopy (TEM, JEOL, JEM-2010F, 200kV). The surface state of the samples was obtained by X-Ray diffraction (XRD, D/max-2500/PC, Rigaku) with Cu  $K\alpha$  radiation ( $\lambda=0.15406\ \text{nm}$ ) operated at 40 kV and 150 mA. Raman spectra were collected in the range of 200-800  $\text{cm}^{-1}$  and X-ray photoelectron spectroscopy (XPS, Thermo Fisher, Escalab 250Xi, Al  $K\alpha$ ) in the range of 0 to 1350 eV at a step of 1 eV.

### ***Electrochemical measurements***

All electrochemical measures were performed on a CHI 760e electrochemical workstation using a standard three-electrode test. Our samples directly served as the working electrodes. The reference electrode was a saturated calomel electrode (SCE) in acid and neutral solution and Hg/HgO in alkali. A graphite rod was used as a counter electrode. All the potentials were converted to RHE. The polarization curves were measured at 5  $\text{mV s}^{-1}$  with 80%  $iR$  compensation. The cyclic voltammetry curves for fitting double-layer capacitance ( $C_{dl}$ ) were measured at 10-50  $\text{mV s}^{-1}$  from 0-0.1V vs. RHE. The noble metal electrodes of Pt/C (20 wt%) and  $\text{RuO}_2$  were prepared on CNT film with loading of 5 $\text{mg/cm}^2$  via drop 1 ml of catalyst ink

containing 3.93 mg of catalyst powder, 50  $\mu\text{L}$  of Nafion, 500  $\mu\text{L}$  of ethanol, and 450  $\mu\text{L}$  of distilled water. Electrochemical impedance spectroscopy (EIS) measurements were tested at an overpotential of 300 mV with the frequency range from  $10^5$  to  $10^{-2}$  Hz with an AC amplitude of 5 mV.

### Models of bubbles at the edge of drilled pores and on the surface of electrodes

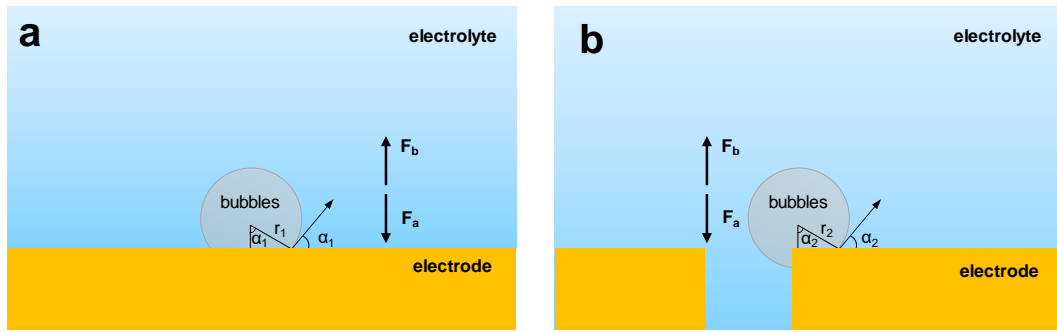

**Fig. S1.** (a) and (b) show the bubbles on the plane of the electrode and the bubbles at the edge, respectively.

The bubbles maintain the shape of a sphere owing to the intrinsic contact angle of gas and liquid considered to be  $180^\circ$ , Buoyant force ( $F_b$ ) and adhesion force ( $F_a$ ) follow the formulas below: <sup>[S3]</sup>

$$F_b = \rho_{\text{electrolyte}} \cdot g \cdot V_{\text{bubble}} \quad (1)$$

$$F_a = \gamma 2\pi(r \sin\alpha) \sin\alpha \quad (2)$$

Because of the same electrolyte, catalyst, and gas at different sites, the value of contact angles  $\alpha_1$  and  $\alpha_2$  are the same. We assume that there are two bubbles with the same volume attach to the plane and the edge of the electrode, respectively. At this time,  $F_{b1} = F_{b2}$  and  $r_1 > r_2$  since  $V_1 = V_2$ . However,  $F_a$  is linearly related to radius of bubbles, which result in  $F_{a1} > F_{a2}$ . So for

the same volume of bubbles, which represents the same number of gas molecules, the  $F_a$  on the plane of the electrode is greater than that at the edge, and the bubbles on the plane are more difficult to desorb.

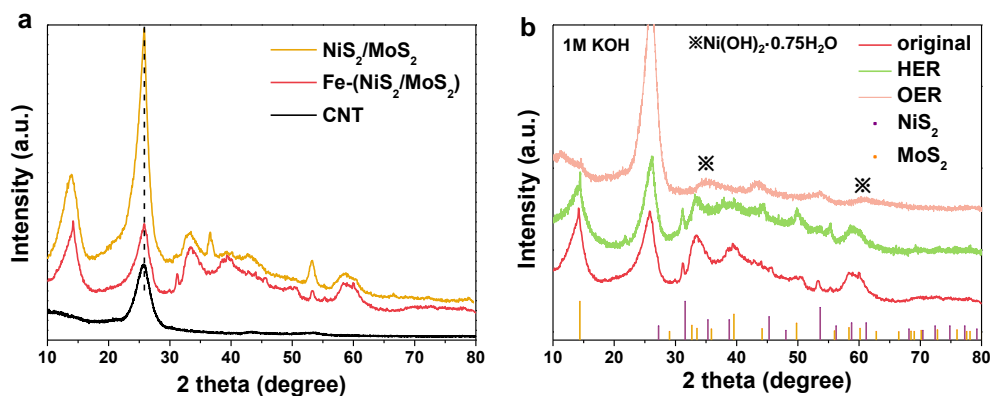

**Fig. S2.** XRD patterns of (a) Fe-(NiS<sub>2</sub>/MoS<sub>2</sub>)/CNT, NiS<sub>2</sub>/MoS<sub>2</sub>/CNT, pure CNT at a range of 10-80 degree, and (b) Comparison between before and after HER and OER stability measures (8h @10 mA cm<sup>-2</sup>, 8h @100 mA cm<sup>-2</sup> and 8h @200 mA cm<sup>-2</sup>).

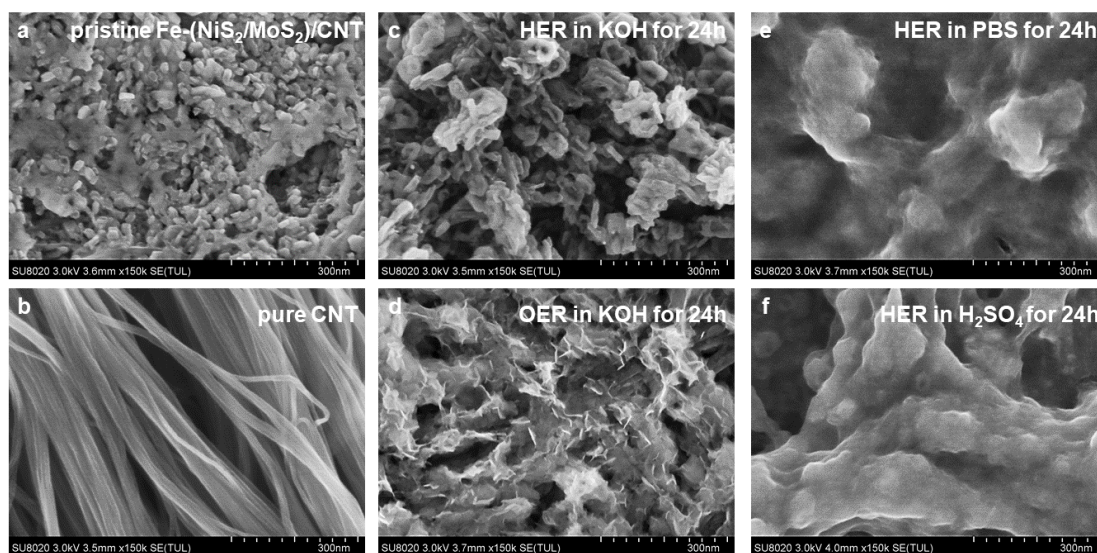

**Fig. S3.** SEM images of (a) Fe-(NiS<sub>2</sub>/MoS<sub>2</sub>)/CNT, (b) pure CNT film, (c) Fe-(NiS<sub>2</sub>/MoS<sub>2</sub>)/CNT after 24h HER in 1M KOH, (d) Fe-(NiS<sub>2</sub>/MoS<sub>2</sub>)/CNT after 24h OER in 1M KOH, (e) Fe-(NiS<sub>2</sub>/MoS<sub>2</sub>)/CNT after 24h HER in 1M PBS and (f) Fe-(NiS<sub>2</sub>/MoS<sub>2</sub>)/CNT after 24h HER in 0.5M H<sub>2</sub>SO<sub>4</sub>. All the tests were performed at the current density of 10 mA cm<sup>-2</sup>.

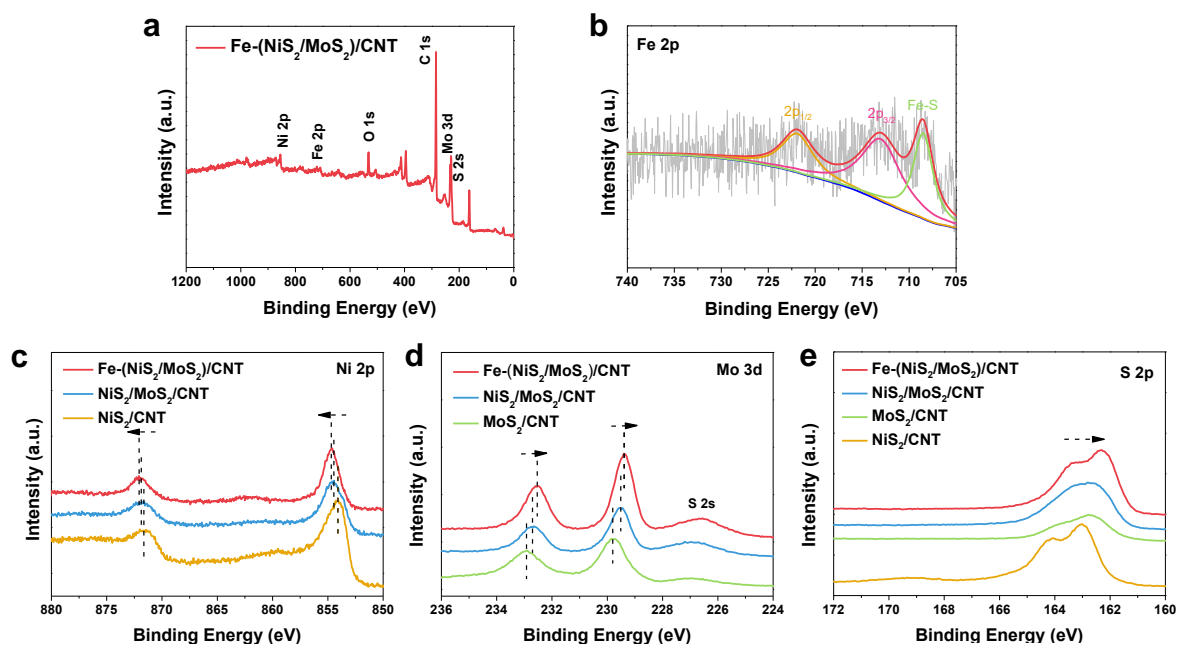

**Fig. S4.** XPS profiles of (a) Fe-(NiS<sub>2</sub>/MoS<sub>2</sub>)/CNT survey spectra and (b) Fe 2p of Fe-(NiS<sub>2</sub>/MoS<sub>2</sub>)/CNT. Comparison of NiS<sub>2</sub>/CNT, MoS<sub>2</sub>/CNT, NiS<sub>2</sub>/MoS<sub>2</sub>/CNT and Fe-NiS<sub>2</sub>/MoS<sub>2</sub>/CNT for (c) Ni 2p, (d) Mo 3d and (e) S 2p.

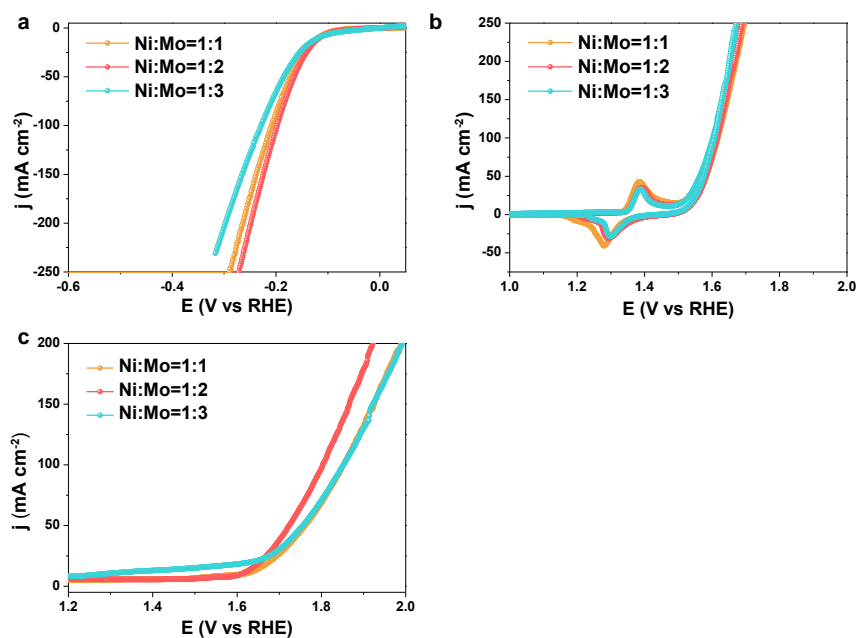

**Fig. S5.** Polarization curves of electrocatalysts obtained by different ratios of Ni and Mo for NiS<sub>2</sub>/MoS<sub>2</sub>/CNT in 1M KOH at a scan rate of 5 mV s<sup>-1</sup> for (a) HER (b) OER and (c) overall water splitting.

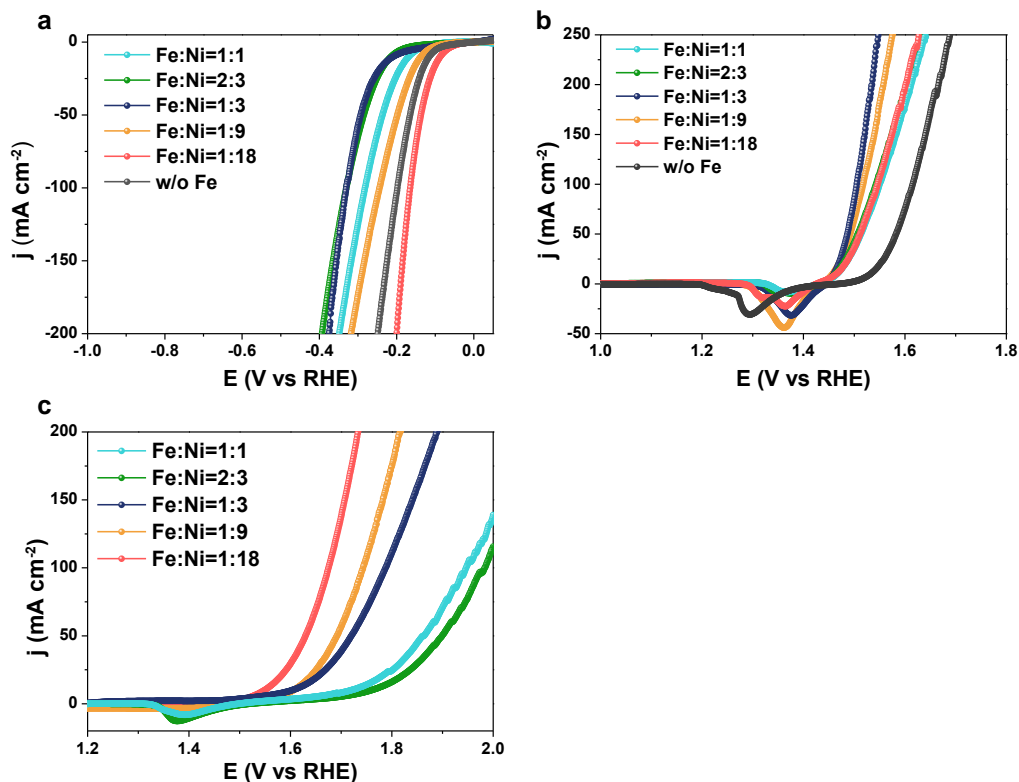

**Fig. S6.** Polarization curves of electrocatalysts obtained by different ratios of Fe and Ni of Fe-(NiS<sub>2</sub>/MoS<sub>2</sub>)/CNT in 1M KOH at a scan rate of 5 mV s<sup>-1</sup> for (a) HER (b) OER and (c) overall water splitting.

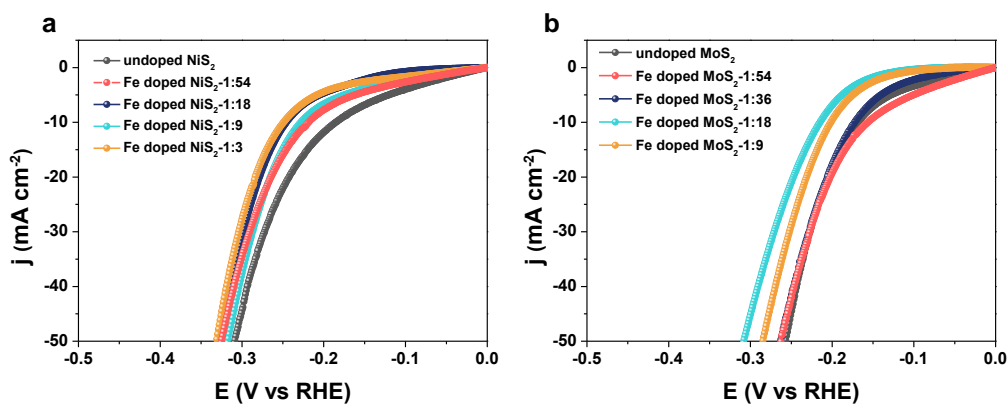

**Fig. S7.** Polarization curves of (a) NiS<sub>2</sub> and (b) MoS<sub>2</sub> with different Fe doping contents in 1M KOH at a scan rate of 5 mV s<sup>-1</sup>. The legends in (a) and (b) indicate the Fe:Ni atomic ratio and the Fe:Mo atomic ratio, respectively.

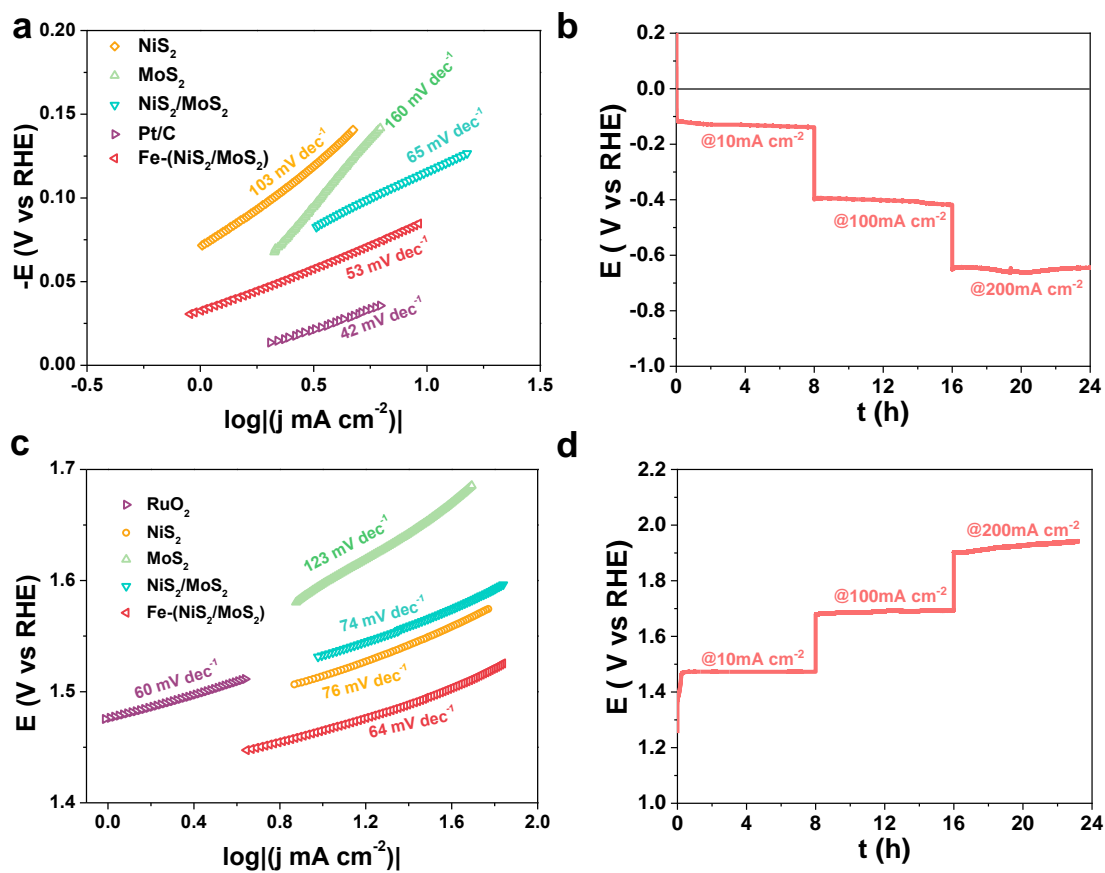

**Fig. S8.** (a) Tafel plots of various electrocatalysts obtained in 1M KOH at a scan rate of 5 mV s $^{-1}$  for HER. (b) Electrochemical stability test at 10/100/200 mA cm $^{-2}$  of Fe-(NiS $_2$ /MoS $_2$ )/CNT for HER. (c) Tafel plots of various electrocatalysts obtained in 1M KOH at a scan rate of 5 mV s $^{-1}$  for OER. (d) Electrochemical stability test at 10/100/200 mA cm $^{-2}$  of Fe-(NiS $_2$ /MoS $_2$ )/CNT for OER.



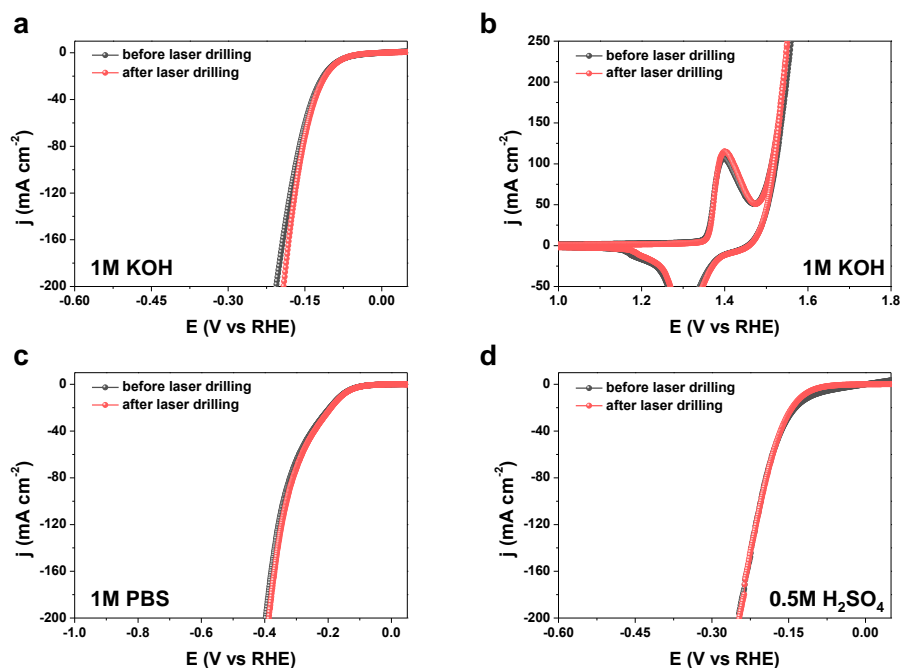

**Fig. S9.** Electrochemical performance of Fe-(NiS<sub>2</sub>/MoS<sub>2</sub>)/CNT before and after laser drilling for (a) HER in 1M KOH, (b) OER in 1M KOH, (c) HER in 1M PBS, and (d) HER in 0.5M H<sub>2</sub>SO<sub>4</sub>. The drilled periodic micropores in the catalyst have a diameter of 40  $\mu$ m and a spacing of 800  $\mu$ m.

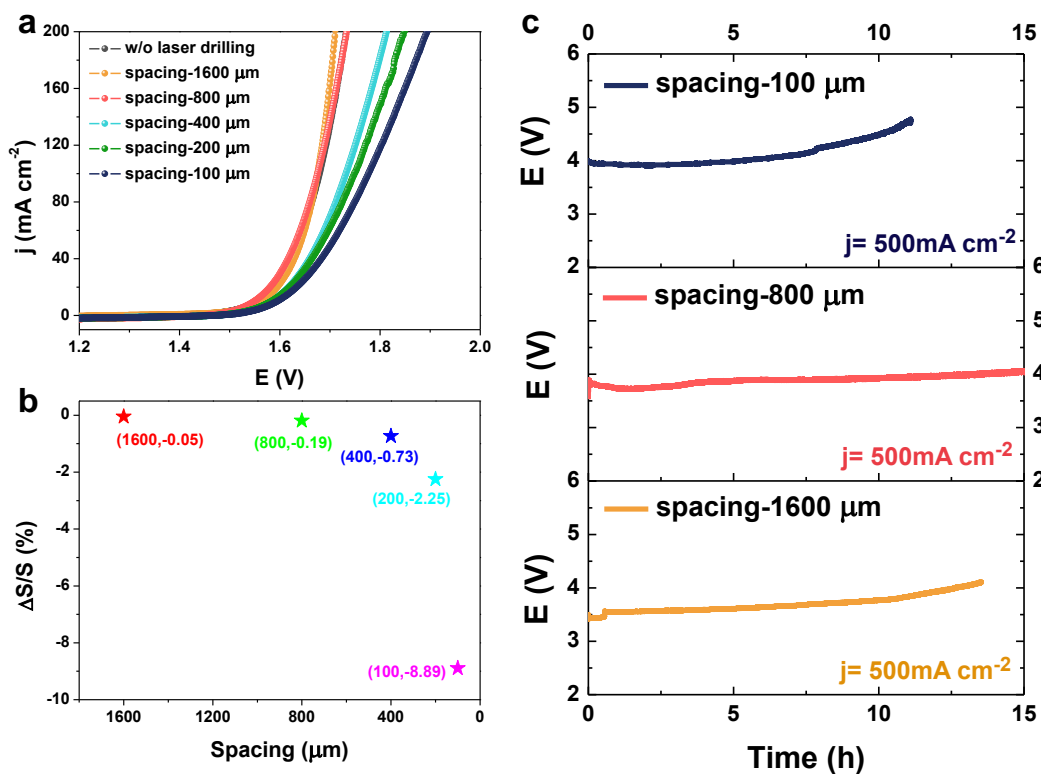

**Fig. S10.** (a) Polarization curves, (b) estimated surface area loss, and (c) long-term stability

tests at  $500 \text{ mA cm}^{-2}$  of the Fe-(NiS<sub>2</sub>/MoS<sub>2</sub>)/CNT electrode drilled with different spacing of micropores.

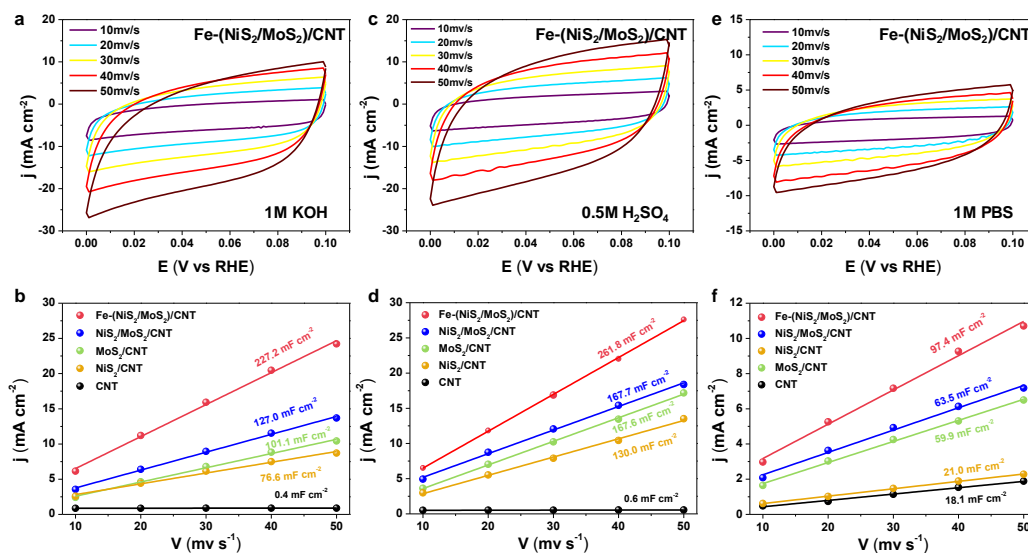

**Fig. S11.** Cyclic voltammograms (CV) curves of Fe-(NiS<sub>2</sub>/MoS<sub>2</sub>)/CNT at different scan rates in (a) 1M KOH, (c) 0.5M H<sub>2</sub>SO<sub>4</sub>, and (e) 1M PBS, and electrochemical  $C_{dl}$  of Fe-(NiS<sub>2</sub>/MoS<sub>2</sub>)/CNT, NiS<sub>2</sub>/MoS<sub>2</sub>/CNT, NiS<sub>2</sub>/CNT, MoS<sub>2</sub>/CNT, and pure CNT film in (b) 1M KOH, (d) 0.5M H<sub>2</sub>SO<sub>4</sub>, and (f) 1M PBS.

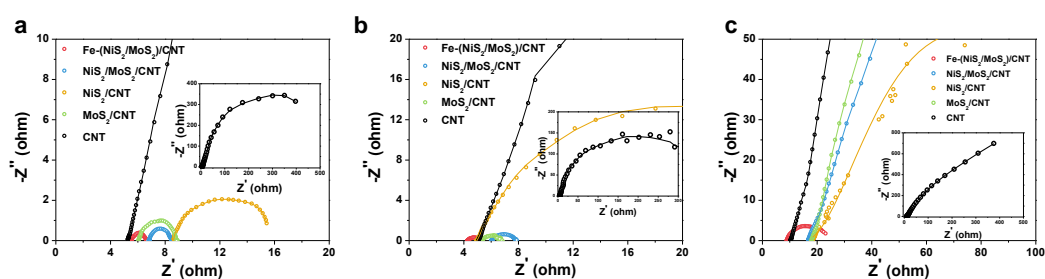

**Fig. S12.** Nyquist plots of the obtained electrocatalysts at a potential of -300 mV versus RHE in (a) 1M KOH, (b) 0.5M H<sub>2</sub>SO<sub>4</sub>, and (c) 1M PBS. The AC frequency used in the tests ranges from  $10^5$  to  $10^{-2}$  Hz with an amplitude of 5 mV.

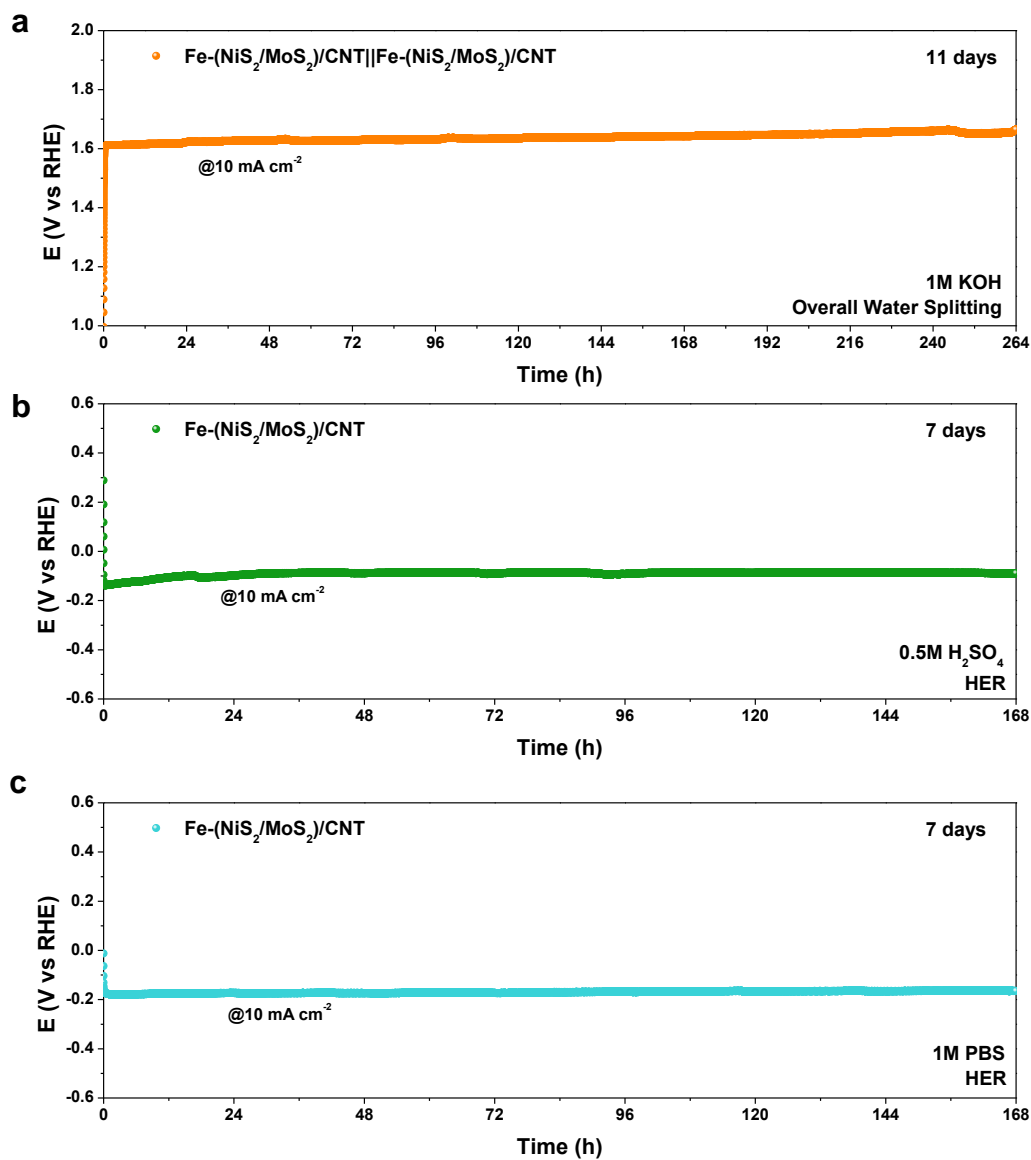

**Fig. S13.** Long-term test of Fe-(NiS<sub>2</sub>/MoS<sub>2</sub>)/CNT for (a) overall water splitting in 1M KOH over 11 days, (b) HER in 0.5M H<sub>2</sub>SO<sub>4</sub> over 7 days, and (c) HER in 1M PBS over 7 days. All the tests were performed at the current density of 10 mA cm<sup>-2</sup>.

**Table S1.** Comparison of our electrode with other overall water splitting catalysts.

| <b>catalysts</b>                                                           | <b>Voltage @<math>\eta_{10}</math><br/>(V)</b> | <b>Overpotential of<br/>HER @<math>\eta_{10}</math> (mV)</b> | <b>Overpotential of<br/>OER @<math>\eta_{10}</math> (mV)</b> | <b>Reference</b>                                   |
|----------------------------------------------------------------------------|------------------------------------------------|--------------------------------------------------------------|--------------------------------------------------------------|----------------------------------------------------|
| <b>Light Fe-doped<br/>(NiS<sub>2</sub>/MoS<sub>2</sub>)/CNT</b>            | <b>1.51</b>                                    | <b>87</b>                                                    | <b>234</b>                                                   | <b>This Work</b>                                   |
| N-NiMoO <sub>4</sub> /NiS <sub>2</sub>                                     | 1.60                                           | 57                                                           | 267                                                          | <i>Adv. Funct. Mater.</i><br>2019,29, 1805298.     |
| Ni <sub>3</sub> N-VN/NF(HER)<br>Ni <sub>2</sub> P-VP <sub>2</sub> /NF(OER) | 1.51                                           | 64                                                           | 306 @ $\eta_{50}$                                            | <i>Adv.Mater.</i> :2019,<br>31, 1901174            |
| MoS <sub>2</sub> /NiS Yolk–<br>Shell                                       | 1.64                                           | 244                                                          | 350                                                          | <i>Small</i> , 2019, 15,<br>1803639.               |
| N-Ni <sub>3</sub> S <sub>2</sub> /NF                                       | 1.48                                           | 110                                                          | 350 @ $\eta_{170}$                                           | <i>Adv.Mater.</i> :2017,<br>29, 1701584.           |
| V-doped NiS <sub>2</sub>                                                   | 1.56                                           | 110                                                          | 290                                                          | <i>ACS Nano</i> 2017,<br>11, 11574.                |
| NiFeS <sub>2</sub> /Ni                                                     | 1.60                                           | 126                                                          | 234 @ $\eta_{50}$                                            | <i>J. Mater. Chem. A</i><br>2018, 6,4346.          |
| MoS <sub>2</sub> /NiS <sub>2</sub><br>Nanosheets                           | 1.59                                           | 62                                                           | 278                                                          | <i>Adv. Sci.</i> 2019<br>1900246.                  |
| MoS <sub>2</sub> /Ni <sub>3</sub> S <sub>2</sub>                           | 1.56                                           | 110                                                          | 218                                                          | <i>Angew. Chem.</i><br>2016, 128,6814.             |
| NC/CuCo/CuCoO <sub>x</sub>                                                 | 1.53                                           | 112                                                          | 190                                                          | <i>Adv. Funct. Mater.</i><br>2018, 28,<br>1704447. |
| Se-(NiCo)S <sub>x</sub> /(OH) <sub>x</sub>                                 | 1.60                                           | 103                                                          | 155                                                          | <i>Adv. Mater.</i> 2018,<br>30, 1705538.           |
| NiFeP/SG                                                                   | 1.54                                           | 115                                                          | 218                                                          | <i>Nano Energy</i><br>2019, 58, 870.               |

## REFERENCES

(S1) X. Zhang, K. Jiang, C. Feng, P. Liu, L. Zhang, J. Kong, T. Zhang, Q. Li and S. Fan, *Adv. Mater.*, 2006, **18**, 1505-1510.

(S2) K. Liu, Y. Sun, L. Chen, C. Feng, X. Feng, K. Jiang, Y. Zhao and S. Fan, *Nano Lett.*, 2008, **8**, 700-705.

(S3) Z. Lu, Y. Li, X. Lei, J. Liu and X. Sun, *Mater. Horiz.*, 2015, **2**, 294-298.
